# Supplementary material for: Supplementation of n-3 PUFAs in Adulthood Attenuated Susceptibility to Pentylenetetrazol Induced Epilepsy in Mice Fed with n-3 PUFAs Deficient Diet in Early Life
Source: MDPI journal article supplement (doi:10.3390/md21060354), 2023-06-09
Supplement: s1 [file s1]

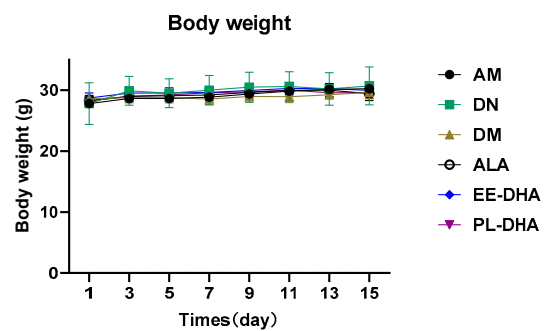

Figure S1 Body weight variation of the mice during PTZ administration.

**Table S1** Parameters of neurotransmitter for MS condition.

| Name                        | Abbreviation | Ion mode | precursor ion (m/z) | product ion (m/z) | NCE (V) |
|-----------------------------|--------------|----------|---------------------|-------------------|---------|
| Glutamate                   | Glu          | +        | 148                 | 130               | 40      |
| $\gamma$ -aminobutyric acid | GABA         | +        | 104.1               | 87                | 40      |
| Dopamine                    | DA           | +        | 154.1               | 137.1             | 40      |
| 5-hydroxytryptamine         | 5-HT         | +        | 177.1               | 160.1             | 90      |
| 5-hydroxyindoleacetic acid  | 5-HIAA       | +        | 192                 | 146               | 80      |
